# Supplementary material for: Moral distress and its contribution to the development of burnout syndrome among critical care providers
Source: Springer Nature journal article supplement (doi:10.1186/s13613-017-0293-2), 2017-06-21
Supplement: MOESM4 [file 12461646]

| Moral Distress Scale Items                                                                                                                                  | Frequency (F) score |   |   |   |   | Level of disturbance score [Intensity (I)] |   |   |   |   | Composite Score "F"x "I" |
|-------------------------------------------------------------------------------------------------------------------------------------------------------------|---------------------|---|---|---|---|--------------------------------------------|---|---|---|---|--------------------------|
|                                                                                                                                                             | Never -----Very     |   |   |   |   | None-----Great extent                      |   |   |   |   |                          |
|                                                                                                                                                             | 0                   | 1 | 2 | 3 | 4 | 0                                          | 1 | 2 | 3 | 4 | Range [ 0 - 16]          |
| 1. Provide less than optimal care due to pressures from administrators or insurers to reduce costs.                                                         |                     |   |   |   |   |                                            |   |   |   |   |                          |
| 2. Witness healthcare providers giving "false hope" to the patient or family                                                                                |                     |   |   |   |   |                                            |   |   |   |   |                          |
| 3. Follow the family's wishes to continue life support even though I believe it is not in the best interest of the patient                                  |                     |   |   |   |   |                                            |   |   |   |   |                          |
| 4. Initiate extensive life-saving actions when I think they only prolong death                                                                              |                     |   |   |   |   |                                            |   |   |   |   |                          |
| 5. Follow the family's request not to discuss death with a dying patient who asks about dying                                                               |                     |   |   |   |   |                                            |   |   |   |   |                          |
| 6. Feel pressure from others to order what I consider to be unnecessary tests and treatments                                                                |                     |   |   |   |   |                                            |   |   |   |   |                          |
| 7. Continue to participate in care for a hopelessly ill person who is being sustained on a ventilator, when no one will make a decision to withdraw support |                     |   |   |   |   |                                            |   |   |   |   |                          |
| 8. Avoid taking action when I learn that a physician or nurse colleague has made a medical error and does not report it                                     |                     |   |   |   |   |                                            |   |   |   |   |                          |
| 9. Assist physician or other health care providers who in my opinion are not as competent as the patient care requires                                      |                     |   |   |   |   |                                            |   |   |   |   |                          |
| 10. Be required to care for patients I do not feel qualified to care for                                                                                    |                     |   |   |   |   |                                            |   |   |   |   |                          |
| 11. Let medical students perform painful procedures on patients solely to improve their skill                                                               |                     |   |   |   |   |                                            |   |   |   |   |                          |
| 12. Provide care that does not relieve the patient's suffering because I fear that increasing the dose of pain medication will cause death                  |                     |   |   |   |   |                                            |   |   |   |   |                          |
| 13. Request nurses or others not to discuss the patient's prognosis with the patient or family                                                              |                     |   |   |   |   |                                            |   |   |   |   |                          |
| 14. Increase the dose of sedatives/opiates for an unconscious patient that I believe could hasten the patient's death                                       |                     |   |   |   |   |                                            |   |   |   |   |                          |
| 15. Take no action about an observed ethical issue because the involved staff member or someone in a position of authority requested that I do nothing      |                     |   |   |   |   |                                            |   |   |   |   |                          |
| 16. Follow the family's wishes of the patient's care when I do not agree with them, but do so because of fears of a lawsuit                                 |                     |   |   |   |   |                                            |   |   |   |   |                          |
| 17. Work with nurses or other healthcare providers who are not as competent as the patient care requires.                                                   |                     |   |   |   |   |                                            |   |   |   |   |                          |
| 18. Witness diminished patient care quality due to poor team communication                                                                                  |                     |   |   |   |   |                                            |   |   |   |   |                          |
| 19. Ignore situations in which patients have not been given adequate information to insure informed consent                                                 |                     |   |   |   |   |                                            |   |   |   |   |                          |
| 20. Watch patient care suffers because of a lack of provider continuity.                                                                                    |                     |   |   |   |   |                                            |   |   |   |   |                          |
| 21. Work with levels of nurse or other care provider staffing that I consider unsafe.                                                                       |                     |   |   |   |   |                                            |   |   |   |   |                          |
| <b>Total value</b>                                                                                                                                          |                     |   |   |   |   |                                            |   |   |   |   | <b>Range [ 0 - 336]</b>  |
